# Supplementary material for: Features of Patients Receiving Extracorporeal Membrane Oxygenation Relative to Cardiogenic Shock Onset: A Single-Centre Experience
Source: MDPI journal article supplement (doi:10.3390/medicina57090886), 2021-08-27
Supplement: s1 [file s1]

**Supplementary Table S1.** The factors associated with bailout ECMO insertion, and found that advanced age ( $\geq 70$  years), preadmission CS, absence of hypertension, and starting CPR within 9 min of the MI were beneficial; however, the benefits were not statistically significant

|                  | OR        | lower      | upper     | p    |
|------------------|-----------|------------|-----------|------|
| $\geq 70$        | 1.071429  | 0.1498046  | 9.295385  | 0.95 |
| <70              | 0.6346154 | 0.1621109  | 2.383080  | 0.50 |
| Male             | 0.8333333 | 0.2604926  | 2.652820  | 0.76 |
| prAD             | 1.625000  | 0.4124064  | 6.565729  | 0.49 |
| pstAD            | 0.2807018 | 0.03196543 | 1.998874  | 0.21 |
| CPR              | 0.8941176 | 0.1933593  | 3.919993  | 0.88 |
| without CPR      | 0.2       | 0.02228416 | 1.288123  | 0.11 |
| HTN              | 0.2755102 | 0.0487994  | 1.270656  | 0.11 |
| Without HTN      | 1.846154  | 0.3918400  | 10.333493 | 0.45 |
| DM               | 0.480000  | 0.07789652 | 2.574874  | 0.40 |
| without DM       | 0.9176471 | 0.2263965  | 3.821796  | 0.90 |
| PCI              | 0.75      | 0.02249796 | 24.66442  | 0.86 |
|                  | 0.6956522 | 0.2191687  | 2.170015  | 0.53 |
| CPR within 9min  | 1.222222  | 0.1324763  | 9.559886  | 0.85 |
| PCI to LM or LAD | 0.6666667 | 0.1461941  | 2.786112  | 0.58 |
